1 **Rapid Characterization of Human Serum Albumin Binding for Per- And Polyfluoroalkyl**  
2 **Substances Using Differential Scanning Fluorimetry**

3

4 Thomas W. Jackson, Chris M. Scheibly, M. E. Polera, and Scott M. Belcher\*

5

6 Center for Human Health and the Environment

7 Department of Biological Sciences

8 North Carolina State University

9 127 David Clark Labs Campus Box 7617

10 Raleigh, North Carolina, USA

11

12 Email Address: Thomas W. Jackson: [twjacks2@ncsu.edu](mailto:twjacks2@ncsu.edu)

13 M.E. Polera: [mpolera2@ncsu.edu](mailto:mpolera2@ncsu.edu)

14 Chris M. Scheibly: [cmscheib@ncsu.edu](mailto:cmscheib@ncsu.edu)

15 Scott M. Belcher: [smbelch2@ncsu.edu](mailto:smbelch2@ncsu.edu)

16

17 \*Corresponding Author: Scott M. Belcher, [smbelch2@ncsu.edu](mailto:smbelch2@ncsu.edu)

18 Telephone: 919-513-1214

19

20 **Funding:** The research reported in this publication was supported by the National Institute of  
21 Environmental Health Sciences of the National Institutes of Health under Award Number  
22 P42ES031009 and T32ES007046. The content is solely the responsibility of the authors and  
23 does not necessarily represent the official views of the National Institutes of Health. Additional  
24 support was provided by an NC State University Office of Undergraduate Research Summer  
25 Fellowship.

26

27 **Conflicts:** The authors declare no conflicts of interest.

28 **Abstract**

29 Per- and polyfluoroalkyl substances (PFAS) are a diverse class of synthetic chemicals that  
30 accumulate in the environment. Many proteins, including the primary human serum transport  
31 protein albumin (HSA), bind PFAS. The predictive power of physiologically based  
32 pharmacokinetic modeling approaches are currently limited by a lack of experimental data  
33 defining albumin binding properties for most PFAS. A novel thermal denaturation assay was  
34 optimized to evaluate changes in thermal stability of HSA in the presence of increasing  
35 concentrations of known ligands and a structurally diverse set of PFAS. Assay performance was  
36 initially evaluated for fatty acids and HSA binding drugs ibuprofen and warfarin. Concentration  
37 response relationships were determined and dissociation constants ( $K_d$ ) for each compound  
38 were calculated using regression analysis of the dose-dependent changes in HSA melting  
39 temperature. Estimated  $K_d$  values for HSA binding of octanoic acid, decanoic acid,  
40 hexadecenoic acid, ibuprofen and warfarin agreed with established values. The binding affinities  
41 for 24 PFAS that included perfluoroalkyl carboxylic acids (C4-C12), perfluoroalkyl sulfonic acids  
42 (C4-C8), mono- and polyether perfluoroalkyl ether acids, and polyfluoroalkyl fluorotelomer  
43 substances were determined. These results demonstrate the utility of this differential scanning  
44 fluorimetry assay as a rapid high through-put approach for determining the relative protein  
45 binding properties and identification of chemical structures involved in binding for large numbers  
46 of structurally diverse PFAS.

47        **Keywords:** Alcohols, Carboxylic Acids, Fluorocarbons, Perfluorocarbons, Protein, Sulfonic  
48        Acids, Telomer, Thermal stability, Toxicokinetic

## 49 1. Introduction

50 Per- and polyfluoroalkyl substances (PFAS) are a large class of persistent synthetic  
51 chemicals used in a wide-variety of industrial and consumer applications.<sup>1-3</sup> The perfluorinated  
52 aliphatic backbones of PFAS are hydrophobic, chemically inert, and thermally stable;  
53 consequently, they are persistent and accumulate in the environment and in biota.<sup>4</sup> The most  
54 recent comprehensive analysis by the Organization of Economic Cooperation and Development  
55 identified > 4,730 PFAS-related CAS registry numbers, including 947 compounds that were  
56 registered in the EPA Toxic Substances Control Act (TSCA) chemical inventory.<sup>5</sup>

57 Production and use of long-chain perfluoroalkyl acids (PFAA; e.g, perfluoroalkylcarboxylic  
58 acids (PFCA) with  $\geq$  seven fluorinated carbons and perfluoroalkylsulfonic acids (PFSA) with  $\geq$   
59 six fluorinated carbons), began in the 1950s and continued in the United States until 2002, when  
60 manufacturers began to phase out long-chain PFAA due to their persistence and toxicity. As a  
61 response to the phaseout, short-chain PFAS are increasingly used as replacement chemistries  
62 in many applications and processes.<sup>6</sup> Common examples of these replacement chemistries  
63 include PFCA and PFSA with shorter fluoroalkyl chains [e.g. perfluorobutanecarboxylic acid  
64 (PFBA) and perfluorobutanesulfonic acid (PFBS)], per- and polyfluoroalkyl ether acids (PFEA)  
65 that contain one or more ether moieties [e.g. hexafluoropropylene oxide dimer acid (HFPO-DA)],  
66 and fluorotelomer acids and alcohols with perfluoroalkyl length  $\leq$  six.<sup>1,7,8</sup> Since their introduction,  
67 shorter chain replacement PFAS are now detected ubiquitously in the environment and are  
68 accumulating in people and other organisms across the world.<sup>9-11</sup>

69 The physiochemical properties, exposure, and toxicity of perfluorooctanoic acid (PFOA) and  
70 perfluorooctanesulfonic acid (PFOS) are most well characterized. By contrast, there are only  
71 limited data available for the majority of known PFAS, including most of the replacement PFAS  
72 currently in use. The 1000's of PFAS for which there is a paucity of available data necessitates  
73 the use of high throughput and predictive computational strategies to characterize the  
74 physiochemical properties, bioactivity, and potential toxicity across different classes of PFAS.

75 Recently, physiologically-based pharmacokinetic and molecular dynamics modeling,  
76 quantitative structure-activity relationship, and machine learning approaches have been  
77 developed to predict protein binding affinity for PFAS.<sup>12,13</sup> The predictive capabilities of these  
78 approaches are currently limited by a lack of data defining fundamental physio-chemical and  
79 toxicokinetic properties for most PFAS.

80 Albumin, the primary transport protein for PFOS, PFOA, perfluorononanoic acid (PFNA),  
81 perfluorohexanesulfonic acid (PFHxS), and perfluorodecanoic acid (PFDA), contains multiple  
82 non-specific binding sites that selectively bind fatty acids, hormones, drugs, and some  
83 xenobiotics including PFAS.<sup>14</sup> However, experimentally determined binding affinities of most  
84 PFAS at albumin are unavailable. Current approaches for determining protein binding affinities,  
85 including titration chemistry or surface plasmon resonance, are too resource intensive and time-  
86 consuming to individually determine albumin affinity for each of the thousands of different PFAS.

87 Differential scanning fluorimetry (DSF) is a rapid high throughput method for measuring  
88 ligand binding interactions that is most often used to assess protein stability under various  
89 conditions.<sup>15-17</sup> The DSF assay employs an environmentally sensitive fluorophore that is  
90 quenched while free in solution. Binding of the dye to hydrophobic sites accessible as the  
91 protein unfolds as temperature rises causes unquenching and fluorescence proportional to the  
92 amount of bound dye.<sup>18,19</sup> Protein binding of ligand causes a concentration- and affinity-  
93 dependent stabilization of the folded protein structure observed as an increase in the melting  
94 temperature ( $T_m$ ).<sup>16,20,21</sup> Relative binding affinity of the stabilizing ligand can be calculated from  
95 the dose-response relationship for the change in the  $T_m$ .<sup>17</sup>

96 The goals of this study were to develop and optimize a high throughput DSF assay to rapidly  
97 characterize the relative HSA binding affinity of a variety of different PFAS. An initial set of  
98 control compounds, including fatty acids and albumin-binding drugs ibuprofen and warfarin,  
99 which bind HSA at different binding sites, were used to demonstrate feasibility and evaluate  
100 whether binding affinities estimated from DSF were comparable to known values estimated by

101 other methods. Following optimization of DSF for PFOA and PFOS, binding affinity at HSA was  
102 determined for a structurally diverse set of PFAS that included nine perfluoroalkyl carboxylic  
103 acids of increasing chain length (C4-C12), three perfluoroalkyl sulfonic acids, four ether  
104 containing PFAS and eight fluorotelomer substances. The results from these analyses reveal  
105 that DSF approaches can be used to define protein-binding affinities rapidly and accurately for  
106 large numbers of chemically distinct PFAS, and this approach is able to discriminate between  
107 structurally similar PFAS. These results provide essential experimental data to better  
108 understand this diverse group of environmental contaminants.

109

## 110 **2. Materials and Methods**

### 111 **2.1 Chemicals and reagents**

112 Reagents and solvents used were the highest purity available. All aqueous buffers and solutions  
113 were prepared in sterile Milli-Q A10 water (18 $\Omega$ ; 3 ppb total oxidizable organics). GloMelt ( $\lambda_{\text{Ex}} =$   
114 468 nm  $\lambda_{\text{Em}} = 507$  nm) and carboxyrhodamine (ROX;  $\lambda_{\text{Ex}} = 588$  nm  $\lambda_{\text{Em}} = 608$  nm) dyes were  
115 purchased from Biotium (Fremont, CA). The PFAS analyzed are shown in Figure 1. Octanoic  
116 acid (CAS 124-07-2, purity  $\geq 98\%$ ), Perfluorobutanoic acid (PFBA, CAS 375-22-4, purity  $\geq$   
117 99%), perfluoropentanoic acid (PFPeA, CAS 2706-90-3, purity  $\geq 97\%$ ), perfluoroheptanoic acid  
118 (PFHpA, (CAS 375-85-9, purity  $\geq 98\%$ ), PFOA (CAS 335-67-1 purity  $\geq 95\%$ ), perfluorodecanoic  
119 acid (PFDA, CAS 335-76-2, purity  $\geq 97\%$ ), perfluorododecanoic acid (PFDoA, CAS 307-55-1,  
120 purity  $\geq 96\%$ ), perfluorotetradecanoic acid (PFTDA, CAS 376-06-7, purity  $\geq 96\%$ ), and HFPO-  
121 DA (CAS 13252-13-6, purity  $\geq 97\%$ ) were from Alfa Aesar (Haverhill, MA). Perfluorohexanoic  
122 acid (PFHxA, CAS 307-24-4, purity  $\geq 98\%$ ), perfluorononanoic acid (PFNA, CAS 375-95-1,  
123 purity  $\geq 95\%$ ), Perfluorobutanesulfonic acid (PFBS, CAS 375-73-5, purity  $\geq 98\%$ ), Warfarin  
124 (CAS 81-81-2, purity  $\geq 98\%$ ), and 1H, 1H, 2H, 2H-Perfluorohexane-1-ol (4:2-FTOH, CAS 2043-  
125 47-2, purity  $\geq 97\%$ ) were from TCI America (Portland, OR). Perfluoroundecanoic acid (PFUnDA,  
126 CAS 2058-94-8, purity  $\geq 96\%$ ) was from Oakwood Chemical (Estill, SC),

127 perfluorohexanesulfonic acid (PFHxS, CAS 3871-99-6, purity  $\geq$  98%) was from J&K Scientific  
128 (Beijing, China), and PFOS (CAS 2795-39-3, purity  $\geq$  98%) and Perfluoro-3,6,9-trioxadecanoic  
129 acid (PFO3DoDA, CAS 151772-59-7, purity 98%) were from Matrix Scientific (Columbia, SC).  
130 Nafion byproduct 2 (CAS 749836-20-2, purity  $\geq$  95%), 1,1,1,2,2,3,3-Heptafluoro-3-(1,2,2,2-  
131 tetrafluoroethoxy)propane (E1, CAS 3331-15-2, purity  $\geq$  97%), 1H, 1H, 2H, 2H-Perfluorooctanol  
132 (6:2-FTOH, CAS 647-42-7, purity  $\geq$  97%), 2H,2H,3H,3H-Perfluorohexanoic acid (3:3-FTCA,  
133 CAS 356-02-5, purity  $\geq$  97%), 2H,2H,3H,3H-Perfluorooctanoic acid (5:3-FTCA, CAS 914637-  
134 49-3, purity  $\geq$  97%), 2H,2H,3H,3H-Perfluorononanoic acid (6:3-FTCA, CAS 27854-30-4, purity  
135  $\geq$  97%), 2H,2H,3H,3H-Perfluoroundecanoate (8:3-FTCA, CAS 83310-58-1, purity  $\geq$  97%),  
136 2H,2H,3H,3H-Perfluorohexanesulfonic acid (4:2-FTSA, CAS 757124-72-4, purity  $\geq$  97%) and  
137 2H,2H,3H,3H-Perfluorooctane-1-sulfonate (6:2 FTSA, CAS 59587-39-2, purity  $\geq$  97%) were  
138 from Synquest Laboratories (Alachua, FL). HSA (CAS 70024-90-7, purity  $\geq$  95%, fraction V fatty  
139 acid free) and hexadecanoic acid (CAS 57-10-3, natural, purity  $\geq$  98%) were from Millipore  
140 Sigma (Burlington, MA). HEPES (4-(2-hydroxyethyl)-1-piperazineethanesulfonic acid), sodium  
141 chloride, methanol, dimethylsulfoxide, decanoic acid (CAS 334-48-5, purity  $\geq$  99%) and  
142 ibuprofen (CAS 15687-27-1, purity  $\geq$  99%), and potassium chloride (KCl, CAS 7447-40-7, purity  
143  $\geq$  99.7%) were purchased from Thermo Fisher (Waltham, MA).

## 144 **2.2 Control and Test Chemical Preparation**

145 Stock solutions (20 mM) of PFBA, PFPeA, PFHxA, PFHpA, PFOA, PFBS, PFHxS, PFOS,  
146 HFPO-DA, Nafion bp2, 6:3-FTCA, 6:2-FTSA, decanoic acid, ibuprofen, and KCl were prepared  
147 in aqueous 1x HEPES buffered saline (HBS, 140 mM NaCl, 50 mM HEPES, 0.38 mM Na<sub>2</sub>HPO<sub>4</sub>,  
148 pH 7.2). A 1:1 mixture of HBS and DMSO was used as a solvent for PFNA, PFDA, PFunDA,  
149 and 8:3-FTCA stocks due to limited aqueous solubility, and the fatty acids and warfarin were  
150 dissolved into HBS supplemented with 30% methanol. For experiments evaluating possible  
151 solvent effects 20 mM stock solutions of PFOA were prepared in all three solvents. The HBS  
152 concentrations used in solvents containing DMSO or methanol were adjusted to ensure that the

153 final concentration of the thermal denaturation buffer contained 140 mM NaCl, 50 mM HEPES,  
154 0.38 mM Na<sub>2</sub>HPO<sub>4</sub>. Solution pH for PFAS stocks were confirmed to be 7.4 and stocks were  
155 stored at -20° C. For thermal stability concentration response analysis, stock solutions were  
156 serially diluted into solvent. Stocks of HSA (1 mM) were prepared in 2x HBS and then diluted  
157 with an equal volume of H<sub>2</sub>O to final desired concentrations.

### 158 **2.3 Differential Scanning Fluorimetry**

159 Temperature control and fluorescence detection were performed using a Step One Plus Real-  
160 Time PCR System (Applied Biosystems; Grand Island, NY) with indicator dye (GloMelt)  
161 fluorescence ( $\lambda_{Ex} = 468$  nm  $\lambda_{Em} = 507$  nm) detected using the FAM/SYBR filter set and the  
162 passive reference dye carboxyrhodamine ( $\lambda_{Ex} = 588$  nm  $\lambda_{Em} = 608$  nm) detected using the ROX  
163 channel. Thermal denaturation was performed in sealed optical 96-well reaction plates  
164 (MicroAmp Fast, Applied Biosystems) using the following conditions: 10 minutes at 37° C for  
165 one holding stage, followed by a ramp profile from 37° C to 99° C at a rate of 0.2° C/sec.  
166 Following optimization, each DSF assay contained 0.125 mM HSA in a final volume of 20  $\mu$ l.  
167 Stock solutions of each test chemical were serially diluted into HBS, with final concentrations  
168 ranging from 50  $\mu$ M to 10 mM. Working fluorophore solutions (200x in 0.1% DMSO) diluted  
169 1:20, and ROX (40  $\mu$ M) diluted 1:10 were prepared immediately prior to each experiment with 2  
170  $\mu$ l of each used for each assay. At least two independent plates were run for each experimental  
171 unit. Controls run on each plate included matching vehicle control (no ligand; KCl added for  
172 potassium salts), no protein control, and a minimum of three concentrations of decanoic acid as  
173 a positive control for protein stabilization. To evaluate the sensitivity of the assay to detect  
174 DMSO mediated conversion of HPFO-DA to E1<sup>22</sup>, HFPO-DA was prepared in a 1:1 mixture of  
175 HBS and DMSO and maintained at room temperature for 4 hours before experimental analysis.  
176 To evaluate whether volatile compounds were entering the gas phase to reduce concentrations



177 of PFAS, experiments were performed using different reaction volumes ranging from 10  $\mu$ L to  
178 200  $\mu$ L in each well for 4:2-FTOH, 6:2-FTOH, PFHxS, and 6:2-FTS.

## 179 **2.4 Data analysis and statistics**

180 All presented DSF data are representative of multiple experiments each containing 3 replicates  
181 for each sample. Matching vehicle blank controls lacking test compound were included on the  
182 same plate for each experiment. Raw thermocycler data were exported to Excel (Microsoft) and  
183 statistical analysis was performed using SPSS v26 (IBM, Armonk, NY) or GraphPad Prism  
184 (v8.3.0, GraphPad Software Inc., San Diego, CA). Data are reported as mean values  $\pm$  SD  
185 following background subtraction. Assay data is reported in relative fluorescent light units  
186 (RFU). The  $T_m$  is defined as the temperature at which the maximum change in fluorescence is  
187 observed, indicating half of the protein is unfolded. PFAS concentration response curves were  
188 smoothed using the Savitzky and Golay method<sup>23</sup>,  $EC_{50}$  estimates are derived using a 4-  
189 parameter variable slope model, and dissociation constants were calculated using a single site  
190 ligand binding model using the formula<sup>24</sup>:

$$Y = Bottom + \frac{(Top - Bottom) * (1 - (P - Kd - X + \sqrt{(P + X + Kd)^2 - (4 * P * X)})}{2 * P}$$

191 Top is the maximal response, bottom is minimal response, P is protein concentration,  $K_d$  is  
192 dissociation constant, X is ligand concentration, and Y is change in  $T_m$ . This equation requires  
193 that a maximal response be detected, which is limited by the solubility of the compounds of  
194 interest. This equation fits a concentration-response curve to the melt shift and provides an  
195 estimated dissociation constant. Using this equation, the calculated  $K_d$  is most accurate when its  
196 value is greater than 50% of the protein concentration and requires ligand concentrations  
197 approximately ten times the  $K_d$ <sup>24</sup>.

198 The relationship between number of aliphatic carbons or number of fluorine and the binding  
199 affinity of HSA for each compound was determined using a second order polynomial (quadratic)  
200 best fit with least squares regression. Comparison between protein concentrations and

201 comparisons of calculated binding affinities between different compounds was performed using  
202 one-way analysis of variance (ANOVA) and a Tukey's post hoc test was performed to evaluate  
203 pair-wise differences. Significance between differences in values was defined as  $p < .05$ .

204

### 205 **3. Results**

#### 206 **3.1 Thermal melt assay optimization**

207 Concentrations of HSA between 0.05 mM to 0.625 mM were evaluated to identify the HSA  
208 concentration that yielded maximal signal to noise ratio (Figure 2A). The observed  $T_m$  for HSA  
209 (71.3°C) did not vary across the concentration range analyzed ( $F(4, 10) = 2.19$ ,  $p = .14$ ; Figure  
210 2B). Optimal performance was for assays containing 0.125 mM HSA (Figure 2A). Including an  
211 initial 10-minute preincubation at 37° C decreased the relatively high initial fluorescence  
212 observed for HSA, and the optimal temperature ramp rate was determined to be 0.2° C/sec.  
213 Most study compounds were sufficiently soluble to use 1x HBS as a solvent for 20 mM stock  
214 solutions. The limited aqueous solubility of the C9-C11 PFCA and 8:3-FTCA required use of  
215 HBS containing 50% DMSO, and the fatty acids and warfarin required using 30% methanol as a  
216 solvent. Possible solvent effects were investigated for PFOA that was solubilized in each of the  
217 three solvents. Assay results for HSA binding of PFOA binding were not significantly influenced  
218 by the stock solution solvent ( $F(2, 15) = 0.005$ ,  $p = .996$ ) (Table 1). The increase in potassium  
219 ions from the potassium salts of PFHxS, PFOS, 8:3-FTCA, and 6:2-FTSA did not affect assay  
220 results (data not shown).

#### 221 **3.2 Measurement of HSA binding affinity for known HSA binding compounds**

222 Octanoic acid, decanoic acid, hexadecenoic acid, warfarin, and ibuprofen were used as positive  
223 controls to evaluate whether DSF estimates of binding affinities were comparable to published  
224 values using other methods. Analysis of the fatty acid-induced melting temperature shift of HSA  
225 determined a  $K_d$  of  $2.10 \pm 0.47$  mM for octanoic acid,  $0.74 \pm 0.32$  mM for decanoic (Figure 2C  
226 and 2D), and  $0.030 \pm 0.02$  for hexadecanoic acid (Table 2). Two-way ANOVA revealed that the

227 fatty acids were significantly different ( $F(2, 15) = 63, p < .0001$ ), with Tukey's post-hoc  
228 comparison indicating that each fatty acid was significantly different from the other two  
229 examined. The calculated  $K_d$  for HSA binding of ibuprofen was  $2.39 \pm 0.88$  mM (Figure 2E and  
230 2F) and warfarin was  $0.16 \pm .10$  mM (Table 2). The calculated affinities of HSA binding for each  
231 of all compounds are within the range of previously determined values.<sup>32-35</sup>

### 232 **3.3 Measurement of HSA binding affinity for PFAS**

233 Numerous studies have evaluated albumin binding of PFOA and PFOS.<sup>26-31</sup> Using DSF, the  
234 calculated  $K_d$  for HSA binding of PFOA was  $0.83 \pm 0.38$  mM (Figure 3A and 3B), and  $0.69 \pm$   
235  $0.078$  mM for PFOS (Figure 3C and 3D; Table 3). The calculated  $K_d$  for HSA binding of PFOA  
236 and PFOS were similar to previously reported values, although these values vary greatly  
237 depending on the method and assay conditions.<sup>26-31</sup> The findings from the DSF assay and  
238 calculated dissociation constant for each PFCA (C4-C12), PFSA (C4-C8), the ether-containing  
239 PFAS, (PFAE; Figure 3E and 3F), and eight fluorotelomer compounds are shown in Table 3. It  
240 is notable that the fluorotelomer alcohols 4:2 FTOH and 6:2 FTOH were not bound by HSA and  
241 that fluorotelomer compounds with a carboxylate or sulfonate charged group were bound by  
242 HSA at affinities similar to those observed for PFAA with the same number of aliphatic carbons  
243 (Table 3).

244 To determine whether the high volatility of the fluorotelomer alcohols was responsible for the  
245 absence of albumin binding, values were determined for 4:2-FTOH, 6:2-FTOH, PFHxS, and 6:2-  
246 FTS at volumes of 10, 20, 50, and 200  $\mu$ L that resulted in different volumes of gaseous phase in  
247 each sealed reaction well. At 200  $\mu$ L, the well is with no gas phase. There were no differences  
248 in the thermal shift profile at different volumes for any of the four PFAS measured, findings that  
249 suggest volatility of the fluorotelomer alcohols was not responsible for the lack of albumin  
250 binding (4:2-FTOH,  $F(3, 8) = 0.90, p = .48$ ; 6:2-FTOH,  $F(3, 8) = 0.14, p = .93$ ; PFHxS,  $F(3, 8) =$   
251  $0.63, p = .61$ ; 6:2-FTSA,  $F(3, 8) = 0.67, p = .60$ ).

252 To investigate the sensitivity of the assay to distinguish binding properties for closely related  
253 compounds, we compared assay results for HFPO-DA prepared in aqueous buffer or in DMSO  
254 containing buffer with assay results for E1 directly. In DMSO, HFPO-DA is rapidly converted to  
255 E1 via decarboxylation.<sup>22</sup> Two-way ANOVA of the area under the curve of the concentration-  
256 response curves for HFPO-DA in DMSO, HFPO-DA in buffer alone (Figure 3G), and E1 reveals  
257 significant differences ( $F(2, 29) = 144, p < .0001$ ), with Tukey's post-hoc analysis indicating that  
258 HFPO-DA in DMSO is indistinguishable from the E1 curve with  $EC_{50}$  values of  $2.34 \pm 0.56$  mM  
259 and  $2.36 \pm 0.42$  mM, respectively ( $p = .98$ ; Figure 3H). Tukey's post-hoc analysis found that  
260 HFPO-DA in buffer alone is significantly different from HFPO-DA in DMSO and E1 in buffer  
261 (both  $p < .0001$ ).

### 262 **3.4 Physiochemical determinants of HSA binding**

263 To interrogate in more detail determinants of HSA binding of PFAS, the relationship between  
264 calculated binding affinities, and the number of per- and polyfluorinated carbons, number of  
265 aliphatic carbons, or total fluorine numbers for the PFCA series from C4-C12 and across all  
266 compounds were analyzed. Except for the PFAE compounds, highest affinity was observed for  
267 compounds containing 6-8 fluorinated carbons, 7-9 aliphatic carbons, and containing 13-17  
268 fluorine (Figure 4). For the PFAE, a simple linear regression was more appropriate. For the  
269 PFCA series from C4-C12, the best-fit curve for binding affinity by number of per- and  
270 polyfluorinated carbons was  $= 6.30 - 1.50X + 0.10X^2$  (Figure 4A;  $R^2 = 0.88$ ) and across all  
271 compounds except PFAE was  $= 4.73 - 1.08X + 0.074X^2$  ( $R^2 = 0.54$ ). For PFAE, the simple  
272 linear regression by per- and polyfluorinated carbons was  $= -0.02X + 1.7$  (Figure 4B;  $R^2 = 0.79$ ).  
273 Except for the PFAE, the best-fit curve for the number of aliphatic carbons was  $= 6.52 -$   
274  $1.39X + 0.083X^2$  (Figure 4C;  $R^2 = 0.69$ ) and by number of fluorine was  $= 5.35 - 0.58X +$   
275  $0.019X^2$  (Figure 4D;  $R^2 = 0.54$ ). For the PFAE family, the linear regression by number of

276 aliphatic carbons was  $= -0.06X+1.9$  (Figure 4C;  $R^2 = 0.52$ ) and by number of fluorine was =  
277  $-0.01X+1.7$  (Figure 4D;  $R^2 = 0.77$ ).

278

#### 279 **4. Discussion:**

##### 280 **4.1 Optimization and demonstration of assay utility**

281 The goal of the current studies was to develop a rapid, high-throughput assay capable of  
282 measuring protein binding affinity of a diverse collection of PFAS compounds. The presented  
283 experiments describe the optimization and use of a DSF assay for assessing HSA binding  
284 properties for control compounds known to bind albumin and 24 PFAS from six subclasses.  
285 Critical initial experiments aimed to optimize DSF for measuring PFAS binding included  
286 determination of optimal protein and dye concentrations to maximize signal to noise ratio. Those  
287 efforts were found especially critical for determining albumin binding due to its multiple surface  
288 accessible hydrophobic binding sites that increased baseline fluorescence.<sup>32</sup> Additional key  
289 factors analyzed during assay development included use of a HEPES buffer to ensure that  
290 PFAS with low pKa did not affect assay pH, maintaining consistent ionic strength, determination  
291 of appropriate solvents, and optimization of assay temperature ramp rates. Results of those  
292 initial experiments identified appropriate conditions for determining the binding affinities of  
293 structurally diverse sets of natural fatty acids, small molecule pharmaceuticals, and multiple  
294 subclasses of PFAS in a rapid (less than 3 hour) format. The accuracy and reproducibility of the  
295 binding affinities calculated using DSF was demonstrated for known albumin-binding drugs  
296 warfarin and ibuprofen, C10-C16 fatty acids, PFOA and PFOS.<sup>25–27,29,31,33–36</sup> Further  
297 demonstrating the utility of this DSF thermal shift approach, comparative evaluation of the HSA  
298 binding affinities of structurally diverse subclasses of PFAS revealed that functional groups,  
299 number of aliphatic carbons, and number of fluorine bonded to carbons were among the key  
300 physiochemical properties that influenced binding.

##### 301 **4.2 Impacts of physiochemical properties on HSA binding affinity**

302 Published  $K_d$  values for HSA binding of fatty acids, drugs, and PFAS are variable and can span  
303 many orders of magnitude.<sup>25–27,29,31,33,35–38</sup> Because the absolute  $K_d$  values depend on the  
304 specific experimental conditions of each assay, it is most useful to compare relative affinities  
305 across different assays. The pattern of HSA affinity for fatty acids observed here is consistent  
306 with previous findings that found affinity increased with longer chain length such that the affinity  
307 of hexadecanoate > decanoate > octanoate.<sup>33,37,38</sup> For these fatty acids, increasing chain length  
308 allows the methylene tails to extend further into the deep hydrophobic cavities of HSA, with HSA  
309 binding sites completely filled by fatty acids of length C18-C20.<sup>39</sup> While HSA can bind fatty acids  
310 longer than C20, binding affinity is decreased because the methylene tails are not fully  
311 accommodated and therefore have lower binding energies than optimal C16-C20 fatty acids.<sup>39</sup>  
312 Some PFAS, specifically PFCA, have structural similarities with fatty acids, and the high-affinity  
313 fatty acid binding sites are likely sites for PFAS interactions.<sup>40</sup> Because PFCAs are fatty acids  
314 with fluorine replacing the aliphatic hydrogens, the same properties that allow albumin to bind  
315 fatty acids also allow albumin to bind PFAS. However, unlike fatty acids, PFAS have fluorinated  
316 alkyl tails that impart oleophobic amphiphilic surfactant properties and decrease the relative  
317 water solubility of PFAS<sup>41</sup>. Because of these complexities, numerous physiochemical  
318 properties, including the number of per- and polyfluorinated carbons, the number of aliphatic  
319 carbons, the number of fluorine attached to aliphatic carbons, and the functional headgroups  
320 were evaluated for their influence on relative binding affinities of HSA for PFAS. Within each  
321 class of analyzed PFAS, HSA relative affinity for aliphatic carbon length was: C4-C5 < C6-C9 >  
322 C10+. The optimal structure for binding with HSA appears to be between six and nine aliphatic  
323 carbons. Unlike fatty acids, the increasing aliphatic backbone of C10+ PFAS appears to prevent  
324 optimal binding due to an increase in net negative charge resulting in oleophobic steric  
325 hindrance that may force the longer-chain PFAA to fold.<sup>40</sup> Consistent with these observations,  
326 molecular docking experiments predict that PFAA with more than 11 carbons cannot easily fit  
327 into the binding pocket of fatty acid binding protein, but these molecular docking studies became

328 less reliable for predicting HSA affinity for PFCA >9 perfluorinated carbons due to a lack of  
329 experimental affinity data.<sup>42</sup> Ng and Hungerbuehler specifically emphasize the critical need for  
330 further experimental data on which to base molecular docking simulations, and the assay  
331 described here can provide this data via rapid comparison of protein affinity for multiple  
332 compounds assayed using the same experimental conditions.<sup>42</sup>

333 The importance of the functional headgroup in the affinity of HSA for PFAS was evaluated by  
334 comparing binding affinity between fluorotelomer compounds with an alcohol headgroup to  
335 those with a carboxylate or sulfonate headgroup. Strikingly, the two fluorotelomer alcohols  
336 tested, 4:2-FTOH and 6:2-FTOH, did not bind HSA. The fluorotelomer compounds with a  
337 carboxylate or sulfonate group were bound by HSA with affinities comparable to PFAA,  
338 demonstrating that the charged functional group is important for HSA binding. Those findings  
339 are consistent with complexation energy analysis demonstrating the fluorinated chain of PFOA  
340 and PFOS interacted significantly with the aliphatic portion of the positively charged guanidinium  
341 groups of Arg 218 and Arg 222 and the backbone amine group of Asn 294, and these  
342 interactions were essential in the overall complexation between HSA and PFAS.<sup>40</sup> However, it is  
343 important to note that E1, an ether PFAS with no charged functional group, was also bound by  
344 albumin. It is likely that E1, and potentially other PFAE, are bound by albumin via a different  
345 mode than the other PFAS. This hypothesis is consistent with the binding patterns of fluorinated  
346 ether anesthetics, where there is evidence of nonpolar binding in subdomain IIIB by enflurane, a  
347 fluorinated ether anesthetic with a nominal dipole that contrasts with the polar binding by similar  
348 compounds with larger dipole moments (e.g. isoflurane).<sup>43</sup>

349 When comparing compounds with the same number of per- and polyfluorinated carbons but  
350 different functional groups, the pattern of binding affinity followed the pattern: ether acids <  
351 carboxylic acids < sulfonic acids. This pattern applied when comparing PFCA to PFSA and  
352 FTCA to fluorotelomer sulfonic acids. Previous reports demonstrate that the longer  
353 perfluorinated chain of PFOS provides greater complexation energy than PFOA, whereby apolar

354 interactions account for much more of the binding between HSA and PFOS via increased van  
355 der Waals interactions.<sup>40</sup> This observation appears to hold true across classes, and increased  
356 van der Waals interactions provided by the additional fluorinated carbon in the PFSA of equal  
357 chain length to the PFCA are explain the increased affinity of HSA for sulfonated moieties.  
358 Similarly, HSA had higher affinity for the fluorotelomer acids than the PFAA with equal numbers  
359 of per- and polyfluorinated carbons, providing further evidence that number of aliphatic carbons  
360 is providing increased stability with HSA by increasing the fit into the hydrophobic binding  
361 pockets. Finally, the findings that albumin had lower affinity for the PFEA than PFAA with the  
362 same number of per- and polyfluorinated carbons are consistent with previous work  
363 demonstrating that linear PFAS bind albumin much more strongly than their branched isomers,  
364 potentially reflecting that ether linkages impart structures similar to those adopted by branched  
365 isomers.<sup>31</sup>

### 366 **4.3 Strengths and limitations**

367 The DSF method utilized here has numerous advantages over typical methods including  
368 titration chemistry or surface plasmon resonance; namely, DSF requires substantially less  
369 protein (0.08 mg of HSA per assay) and the assay can be completed and provide affinity data  
370 for up to 8 PFAS compounds in less than four hours using the 96 well format. Ongoing studies  
371 have demonstrated that the assay is scalable to a 384 well format to further increase  
372 throughput. Additionally, DSF is performed using real-time PCR instruments that are widely  
373 available and accessible by most laboratories<sup>44</sup>. Further, this assay can be easily adapted to  
374 analyze binding affinities for a wide array of purified proteins and assay conditions<sup>16,45,46</sup>. It is  
375 important to note that DSF assays often employ the hydrophobic fluorophore SYPRO Orange,  
376 SYPRO Orange is not compatible with assays containing detergents or surfactants and is not  
377 useful for analyzing PFAS due to the amphipathic surfactant properties of many PFAS. The  
378 assay described here was optimized to use an alternative environment sensing fluorophore  
379 because of anticipated limitations of SYPRO Orange, namely the surfactant and detergent-like



380 properties of many PFAS would render the hydrophobic dyes incompatible.<sup>24</sup> Preliminary  
381 analysis found that a number of commercially available fluorescent rotor dyes, including  
382 dicyanovinyl)julolidine, 9-(2-Carboxy-2-cyanovinyl)julolidine, 4-(4-(dimethylamino)styryl)-N-  
383 methylpyridinium iodide, and the used dye preparation GloMelt™ were compatible for DSF  
384 analysis of PFAS (not shown).

385 An additional strength of this DSF assay is its ability to detect changes in PFAS chemistry,  
386 evidenced by the ability to detect the conversion of HFPO-DA to E1 following incubation in  
387 DMSO. Previous analysis has demonstrated that use of DMSO as a solvent for HFPO-DA  
388 results in rapid and complete conversion of HFPO-DA to E1 in under four hours.<sup>22</sup> Using this  
389 DSF assay, the complete decarboxylation of HFPO-DA by DMSO was demonstrated by the  
390 observed differences in the concentration response relationship differences between HFPO-DA  
391 in HEPES-buffered saline and HFPO-DA in DMSO. The concentration response curve and the  
392 resulting EC<sub>50</sub> and HSA binding affinity values for HFPO-DA in DMSO were found identical to  
393 that of E1 demonstrating the quantitative decarboxylation of HFPO-DA to E1.

394 Whereas we have demonstrated that PFAS compounds in aqueous solutions or prepared in the  
395 solvent methanol or DMSO were compatible with this assay, the limited aqueous solubility of  
396 C12 and longer PFCA and other longer chain PFAS did not allow analysis across the  
397 concentration range needed to accurately determine binding affinities for HSA. Because the  
398 complete range of concentration-response must be determined to accurately evaluate the  
399 binding affinities and associated parameters, the DSF assay is limited to PFAS with sufficient  
400 solubility in aqueous solutions. Additionally, binding affinities determined using the DSF method  
401 are generated over a range of temperatures and are not directly related to dissociation constant  
402 values determined using other methods<sup>47</sup>. The  $\Delta T_m$  used to calculate  $K_d$  has the advantage of  
403 giving a more complete view of the thermodynamic system when comparing compound binding.  
404 Consistent with previous reports that binding affinities calculated using DSF are often lower than  
405 using other methods due to calculating the affinity at melting temperature instead of

406 physiological temperature, the absolute affinities of HSA for PFAS were lower but within the  
407 same order of magnitude of published values <sup>24</sup>. The differences in reported values are at least  
408 partly due to the fact that the dissociation constant is determined at the higher melting  
409 temperature of the protein with ligand, rather than at a constant temperature of 20° or 37° C  
410 typically used for other methods. <sup>34</sup>

411 With these results, we have shown the utility of a rapid and sensitive high throughput DSF  
412 assay that is able to define protein-binding affinities and identify physiochemical properties  
413 involved in protein binding for large numbers of PFAS. This proof-of-concept study was focused  
414 on the major serum transport protein albumin because of its critical role in PFAS distribution and  
415 bioaccumulation. However, because of the flexibility of this assay, PFAS binding properties of  
416 other purified proteins from any species of interest can be evaluated. Key parameters identified  
417 as determinants of PFAS HSA binding of included the constitutive functional groups and the  
418 number of aliphatic carbons. Disruption of the aliphatic chain was found to decrease HSA  
419 binding affinity and potentially alter the modes of binding. This was especially evident for the  
420 tetrafluoroethyl ether E1, which lacked a charged functional group but unlike fluorotelomer  
421 alcohols, was bound by HSA, finding that suggest binding of this short chain PFAS may be  
422 similar to HSA binding of volatile fluoroether anesthetics. Adaptation of the DSF methods  
423 demonstrated here will allow rapid characterization of protein affinity for PFAS, improve  
424 computational modeling of protein-PFAS binding kinetics, and allow prioritization of PFAS for  
425 subsequent toxicity evaluation.

426 **Figure Legends:**

427 **Figure 1. Structures of PFAS analyzed.**

428 **Figure 2: Validation of DSF for measuring control compound binding.** The fluorescence of  
429 HSA alone, normalized to the % maximum, as temperature was increased from 60-90°C is  
430 shown with the melting temperature indicated as the point at which half of the protein is inferred  
431 to be unfolded (A). Increasing concentrations of HSA (0.125 mM to 0.625 mM) from light gray to  
432 black are shown. The fluorescence signal of concentrations below 0.125 mM was not  
433 detectable. The derivative fluorescence of HSA alone, plotted as the derivative of fluorescence  
434 divided by the derivative of time, as temperature was increased from 60-90°C is shown with the  
435 melting temperature indicated as the maximum of the derivative curve (B). Derivative  
436 fluorescent curves for HSA with the fatty acid decanoic acid (C) or known albumin binding  
437 compound ibuprofen (E) as temperature was increased from 60-90°C, are shown with  
438 increasing concentrations of compound indicated by increasing wavelength of color from violet  
439 to red. The maximum change in temperature for HSA alone is shown between the dashed gray  
440 and red lines. The regression of the change in temperature plotted against the logarithmic  
441 transformed concentration, in molar units, is shown for decanoic acid (D) and ibuprofen (F), with  
442 the  $\log(EC_{50})$  indicated by a dashed line.  $n \geq 3$  across at least two replicate plates for all  
443 compounds.

444 **Figure 3: Validation of DSF for measuring PFAS binding.** Derivative fluorescent curves for  
445 HSA with the PFAA PFOA (A), PFOS (C), and Nafion byproduct 2 (E), HFPO-DA (GenX) (G),  
446 as temperature was increased from 60-90°C, are shown with increasing concentrations of  
447 compound indicated by increasing wavelength of color from violet to red. The maximum change  
448 in temperature from HSA alone is shown between the dashed gray and red lines. The  
449 regression of the change in temperature plotted against the logarithmic transformed  
450 concentration, in molar units, is shown for PFOA (B), PFOS (D), Nafion byproduct 2 (F), and  
451 GenX (H) with the  $\log(EC_{50})$  indicated by a dashed line.  $n \geq 3$  across at least two replicate plates

452 for all compounds. In panel (H), the regression of the change in temperature plotted against the  
453 logarithmic transformed concentration, in molar units, is also shown for GenX in DMSO and E1,  
454 along with chemical structures for GenX and E1.

455 **Figure 4: Effect of carbon chain length and fluorine moieties on PFAS binding.** The  
456 binding affinity of the PFCA (A) and all analyzed PFAA and PFAE (B, C, and D) are plotted  
457 against the number of per- and polyfluorinated carbons (A, B), aliphatic carbons, (C), or fluorine  
458 (D). For all PFAA except PFAE, a quadratic line of best fit with 95% confidence interval in  
459 dashed lines was generated using least squares regression. Each class is indicated by different  
460 colors, with PFCA in red, PFSA in orange, PFAE in green, FTCA in blue, and FTSA in purple.  $n$   
461  $\geq 3$  across at least two replicate plates for all compounds.

462

#### 463 **References Cited**

- 464 1. Buck, R. C., Franklin, J., Berger, U., Conder, J. M., Cousins, I. T., de Voogt, P., Jensen, A.  
465 A., Kannan, K., Mabury, S. A. & van Leeuwen, S. P. J. Perfluoroalkyl and polyfluoroalkyl  
466 substances in the environment: terminology, classification, and origins. *Integr. Environ.*  
467 *Assess. Manag.* **7**, 513–541 (2011).
- 468 2. Wang, Z., Cousins, I. T., Scheringer, M., Buck, R. C. & Hungerbühler, K. Global emission  
469 inventories for C4-C14 perfluoroalkyl carboxylic acid (PFCA) homologues from 1951 to 2030,  
470 part II: the remaining pieces of the puzzle. *Environ. Int.* **69**, 166–176 (2014).
- 471 3. Prevedouros, K., Cousins, I. T., Buck, R. C. & Korzeniowski, S. H. Sources, fate and  
472 transport of perfluorocarboxylates. *Environ. Sci. Technol.* **40**, 32–44 (2006).
- 473 4. Houde, M., De Silva, A. O., Muir, D. C. G. & Letcher, R. J. Monitoring of perfluorinated  
474 compounds in aquatic biota: an updated review. *Environ. Sci. Technol.* **45**, 7962–7973  
475 (2011).

- 476 5. Organisation for Economic Co-operation and Development. Toward a New Comprehensive  
477 Global Database of Per-and Polyfluoroalkyl Substances (PFASs): Summary Report on  
478 Updating the OECD 2007 List of per-and Polyfluoroalkyl Substances (PFASs). (2018).
- 479 6. Fourth meeting of the Conference of the Parties to the Stockholm Convention on Persistent  
480 Organic Pollutants. Establishing indicative elements of a work programme to facilitate the  
481 elimination of listed brominated diphenyl ethers and the restriction or elimination of  
482 perfluorooctane sulfonic acid and its salts, perfluorooctane sulfonyl fluoride and other  
483 chemicals listed in Annexes A or B of the Convention at the fourth meeting of the Conference  
484 of the Parties. (2009).
- 485 7. Bowman, J. S. Fluorotechnology is critical to modern life: the FluoroCouncil counterpoint to  
486 the Madrid Statement. *Environ. Health Perspect.* **123**, A112-113 (2015).
- 487 8. Organization for Economic Co-operation and Development (OECD). Results of the 2006  
488 OECD Survey on Production and Use of PFOS, PFAS, PFOA, PFCA, Their Related  
489 Substances and Products/Mixtures Containing These Substances. (2006).
- 490 9. Guillette, T. C., McCord, J., Guillette, M., Polera, M. E., Rachels, K. T., Morgeson, C.,  
491 Kotlarz, N., Knappe, D. R. U., Reading, B. J., Strynar, M. & Belcher, S. M. Elevated levels of  
492 per- and polyfluoroalkyl substances in Cape Fear River Striped Bass (*Morone saxatilis*) are  
493 associated with biomarkers of altered immune and liver function. *Environ. Int.* **136**, 105358  
494 (2020).
- 495 10. Kotlarz, N., McCord, J., Collier, D., Lea, C. S., Strynar, M., Lindstrom, A. B., Wilkie, A.  
496 A., Islam, J. Y., Matney, K., Tarte, P., Polera, M. E., Burdette, K., DeWitt, J., May, K., Smart,  
497 R. C., Knappe, D. R. U. & Hoppin, J. A. Measurement of Novel, Drinking Water-Associated  
498 PFAS in Blood from Adults and Children in Wilmington, North Carolina. *Environ. Health  
499 Perspect.* **128**, 77005 (2020).
- 500 11. Brusseau, M. L., Anderson, R. H. & Guo, B. PFAS concentrations in soils: Background  
501 levels versus contaminated sites. *Sci. Total Environ.* **740**, 140017 (2020).

- 502 12. Cheng, W. & Ng, C. A. A Permeability-Limited Physiologically Based Pharmacokinetic  
503 (PBPK) Model for Perfluorooctanoic acid (PFOA) in Male Rats. *Environ. Sci. Technol.* **51**,  
504 9930–9939 (2017).
- 505 13. Cheng, W. & Ng, C. A. Predicting Relative Protein Affinity of Novel Per- and  
506 Polyfluoroalkyl Substances (PFASs) by An Efficient Molecular Dynamics Approach. *Environ.*  
507 *Sci. Technol.* **52**, 7972–7980 (2018).
- 508 14. Forsthuber, M., Kaiser, A. M., Granitzer, S., Hassl, I., Hengstschläger, M., Stangl, H. &  
509 Gundacker, C. Albumin is the major carrier protein for PFOS, PFOA, PFHxS, PFNA and  
510 PFDA in human plasma. *Environ. Int.* **137**, 105324 (2020).
- 511 15. Layton, C. J. & Hellinga, H. W. Quantitation of protein-protein interactions by thermal  
512 stability shift analysis. *Protein Sci. Publ. Protein Soc.* **20**, 1439–1450 (2011).
- 513 16. Vedadi, M., Niesen, F. H., Allali-Hassani, A., Fedorov, O. Y., Finerty, P. J., Wasney, G.  
514 A., Yeung, R., Arrowsmith, C., Ball, L. J., Berglund, H., Hui, R., Marsden, B. D., Nordlund, P.,  
515 Sundstrom, M., Weigelt, J. & Edwards, A. M. Chemical screening methods to identify ligands  
516 that promote protein stability, protein crystallization, and structure determination. *Proc. Natl.*  
517 *Acad. Sci. U. S. A.* **103**, 15835–15840 (2006).
- 518 17. Niesen, F. H., Berglund, H. & Vedadi, M. The use of differential scanning fluorimetry to  
519 detect ligand interactions that promote protein stability. *Nat. Protoc.* **2**, 2212–2221 (2007).
- 520 18. Senisterra, G., Chau, I. & Vedadi, M. Thermal denaturation assays in chemical biology.  
521 *Assay Drug Dev. Technol.* **10**, 128–136 (2012).
- 522 19. Simeonov, A. Recent developments in the use of differential scanning fluorometry in  
523 protein and small molecule discovery and characterization. *Expert Opin. Drug Discov.* **8**,  
524 1071–1082 (2013).
- 525 20. Matulis, D., Kranz, J. K., Salemme, F. R. & Todd, M. J. Thermodynamic stability of  
526 carbonic anhydrase: measurements of binding affinity and stoichiometry using ThermoFluor.  
527 *Biochemistry* **44**, 5258–5266 (2005).

- 528 21. Senisterra, G. A., Markin, E., Yamazaki, K., Hui, R., Vedadi, M. & Awrey, D. E.  
529 Screening for ligands using a generic and high-throughput light-scattering-based assay. *J.*  
530 *Biomol. Screen.* **11**, 940–948 (2006).
- 531 22. Liberatore, H. K., Jackson, S. R., Strynar, M. J. & McCord, J. P. Solvent Suitability for  
532 HFPO-DA ('GenX' Parent Acid) in Toxicological Studies. *Environ. Sci. Technol. Lett.* **7**, 477–  
533 481 (2020).
- 534 23. Savitzky, Abraham. & Golay, M. J. E. Smoothing and Differentiation of Data by  
535 Simplified Least Squares Procedures. *Anal. Chem.* **36**, 1627–1639 (1964).
- 536 24. Vivoli, M., Novak, H. R., Littlechild, J. A. & Harmer, N. J. Determination of Protein-ligand  
537 Interactions Using Differential Scanning Fluorimetry. *J. Vis. Exp.* (2014) doi:10.3791/51809.
- 538 25. Ràfols, C., Amézqueta, S., Fuguet, E. & Bosch, E. Molecular interactions between  
539 warfarin and human (HSA) or bovine (BSA) serum albumin evaluated by isothermal titration  
540 calorimetry (ITC), fluorescence spectrometry (FS) and frontal analysis capillary  
541 electrophoresis (FA/CE). *J. Pharm. Biomed. Anal.* **150**, 452–459 (2018).
- 542 26. Hebert, P. C. & MacManus-Spencer, L. A. Development of a fluorescence model for the  
543 binding of medium- to long-chain perfluoroalkyl acids to human serum albumin through a  
544 mechanistic evaluation of spectroscopic evidence. *Anal. Chem.* **82**, 6463–6471 (2010).
- 545 27. Chen, Y.-M. & Guo, L.-H. Fluorescence study on site-specific binding of perfluoroalkyl  
546 acids to human serum albumin. *Arch. Toxicol.* **83**, 255–261 (2009).
- 547 28. Sabín, J., Prieto, G., González-Pérez, A., Ruso, J. M. & Sarmiento, F. Effects of  
548 fluorinated and hydrogenated surfactants on human serum albumin at different pHs.  
549 *Biomacromolecules* **7**, 176–182 (2006).
- 550 29. Han, X., Snow, T. A., Kemper, R. A. & Jepson, G. W. Binding of perfluorooctanoic acid  
551 to rat and human plasma proteins. *Chem. Res. Toxicol.* **16**, 775–781 (2003).

- 552 30. Bischel, H. N., Macmanus-Spencer, L. A. & Luthy, R. G. Noncovalent interactions of  
553 long-chain perfluoroalkyl acids with serum albumin. *Environ. Sci. Technol.* **44**, 5263–5269  
554 (2010).
- 555 31. Beesoon, S. & Martin, J. W. Isomer-Specific Binding Affinity of Perfluorooctanesulfonate  
556 (PFOS) and Perfluorooctanoate (PFOA) to Serum Proteins. *Environ. Sci. Technol.* **49**, 5722–  
557 5731 (2015).
- 558 32. Takehara, K., Yuki, K., Shirasawa, M., Yamasaki, S. & Yamada, S. Binding properties of  
559 hydrophobic molecules to human serum albumin studied by fluorescence titration. *Anal. Sci.*  
560 *Int. J. Jpn. Soc. Anal. Chem.* **25**, 115–120 (2009).
- 561 33. Spector, A. A. Fatty acid binding to plasma albumin. *J. Lipid Res.* **16**, 165–179 (1975).
- 562 34. Lee, I. Y. & McMenemy, R. H. Location of the medium chain fatty acid site on human  
563 serum albumin. Residues involved and relationship to the indole site. *J. Biol. Chem.* **255**,  
564 6121–6127 (1980).
- 565 35. Ràfols, C., Zarza, S. & Bosch, E. Molecular interactions between some non-steroidal  
566 anti-inflammatory drugs (NSAID's) and bovine (BSA) or human (HSA) serum albumin  
567 estimated by means of isothermal titration calorimetry (ITC) and frontal analysis capillary  
568 electrophoresis (FA/CE). *Talanta* **130**, 241–250 (2014).
- 569 36. Wu, L.-L., Gao, H.-W., Gao, N.-Y., Chen, F.-F. & Chen, L. Interaction of  
570 perfluorooctanoic acid with human serum albumin. *BMC Struct. Biol.* **9**, 31 (2009).
- 571 37. Vorum, H., Pedersen, A. O. & Honoré, B. Fatty acid and drug binding to a low-affinity  
572 component of human serum albumin, purified by affinity chromatography. *Int. J. Pept. Protein*  
573 *Res.* **40**, 415–422 (1992).
- 574 38. Honoré, B. & Brodersen, R. Detection of carrier heterogeneity by rate of ligand dialysis:  
575 medium-chain fatty acid interaction with human serum albumin and competition with chloride.  
576 *Anal. Biochem.* **171**, 55–66 (1988).



- 577 39. Curry, S. Plasma albumin as a fatty acid carrier. in *Advances in Molecular and Cell*  
578 *Biology* vol. 33 29–46 (Elsevier, 2003).
- 579 40. Salvalaglio, M., Muscionico, I. & Cavallotti, C. Determination of energies and sites of  
580 binding of PFOA and PFOS to human serum albumin. *J. Phys. Chem. B* **114**, 14860–14874  
581 (2010).
- 582 41. Dalvi, V. H. & Rossky, P. J. Molecular origins of fluorocarbon hydrophobicity. *Proc. Natl.*  
583 *Acad. Sci. U. S. A.* **107**, 13603–13607 (2010).
- 584 42. Ng, C. A. & Hungerbuehler, K. Exploring the Use of Molecular Docking to Identify  
585 Bioaccumulative Perfluorinated Alkyl Acids (PFAAs). *Environ. Sci. Technol.* **49**, 12306–12314  
586 (2015).
- 587 43. Liu, R. & Eckenhoff, R. G. Weak polar interactions confer albumin binding site selectivity  
588 for haloether anesthetics. *Anesthesiology* **102**, 799–805 (2005).
- 589 44. Lo, M.-C., Aulabaugh, A., Jin, G., Cowling, R., Bard, J., Malamas, M. & Ellestad, G.  
590 Evaluation of fluorescence-based thermal shift assays for hit identification in drug discovery.  
591 *Anal. Biochem.* **332**, 153–159 (2004).
- 592 45. Ericsson, U. B., Hallberg, B. M., Detitta, G. T., Dekker, N. & Nordlund, P. Thermofluor-  
593 based high-throughput stability optimization of proteins for structural studies. *Anal. Biochem.*  
594 **357**, 289–298 (2006).
- 595 46. Epps, D. E., Sarver, R. W., Rogers, J. M., Herberg, J. T. & Tomich, P. K. The ligand  
596 affinity of proteins measured by isothermal denaturation kinetics. *Anal. Biochem.* **292**, 40–50  
597 (2001).
- 598 47. Gao, K., Oerlemans, R. & Groves, M. R. Theory and applications of differential scanning  
599 fluorimetry in early-stage drug discovery. *Biophys. Rev.* **12**, 85–104 (2020).
- 600

**Table 1. Analysis of solvent effects** 601

| Solvent                     | $K_d$ (mM)      | EC50 (mM)       | $\Delta T_m$ ( $^{\circ}$ C) |
|-----------------------------|-----------------|-----------------|------------------------------|
| HEPES-buffered saline (HBS) | $0.83 \pm 0.27$ | $0.84 \pm 0.10$ | $13.5 \pm 0.26$              |
| Methanol (30% in HBS)       | $0.83 \pm 0.15$ | $0.78 \pm 0.17$ | $13.5 \pm 0.19$              |
| DMSO (50% in HBS)           | $0.84 \pm 0.20$ | $0.85 \pm 0.02$ | $13.2 \pm 0.35$              |

$\Delta T_m$  is  $^{\circ}$ C, EC50 and  $K_d$  are mean values reported in  $\pm$  SD. Each compound was run on at least two separate plates with  $n \geq 4$

**Table 2. Binding affinity of HSA for control compounds**

| Compounds         | CAS ID     | $R^2$ | $\Delta T_m$ ( $^{\circ}$ C) | EC50 (mM)        | $K_d$ (mM)      |
|-------------------|------------|-------|------------------------------|------------------|-----------------|
| Octanoic Acid     | 124-07-2   | 0.93  | $3.1 \pm 0.17$               | $2.15 \pm 0.25$  | $2.10 \pm 0.47$ |
| Decanoic Acid     | 334-48-5   | 0.98  | $12.4 \pm 0.50$              | $0.70 \pm 0.15$  | $0.74 \pm 0.32$ |
| Hexadecanoic Acid | 57-10-3    | 0.95  | $7.2 \pm 0.13$               | $0.084 \pm 0.05$ | $0.03 \pm 0.02$ |
| Ibuprofen         | 15687-27-1 | 0.97  | $12.3 \pm 0.24$              | $2.45 \pm 0.37$  | $2.39 \pm 0.88$ |
| Warfarin          | 81-81-2    | 0.97  | $9.3 \pm 0.21$               | $0.19 \pm 0.06$  | $0.16 \pm 0.10$ |

$\Delta T_m$  is  $^{\circ}$ C, EC50 and  $K_d$  are mean values reported in  $\pm$  SD. Each compound was run on at least two separate plates with  $n \geq 4$

**Table 3. Binding affinity of HSA for PFAS**

| PFCA                                         | Cas ID      | Chain Length | Aliphatic Carbons | Fluorines | $R^2$ | $\Delta T_m$ ( $^{\circ}$ C) | EC50 (mM)        | Kd (mM)          |
|----------------------------------------------|-------------|--------------|-------------------|-----------|-------|------------------------------|------------------|------------------|
| PFBA                                         | 375-22-4    | 3            | 4                 | 7         | 0.94  | $6.48 \pm 0.18$              | $2.61 \pm 0.47$  | $2.57 \pm 0.78$  |
| PFPeA                                        | 2706-90-3   | 4            | 5                 | 9         | 0.97  | $13.1 \pm 0.066$             | $2.14 \pm 0.42$  | $2.10 \pm 0.56$  |
| PFHxA                                        | 307-24-4    | 5            | 6                 | 11        | 0.98  | $10.6 \pm 0.24$              | $1.40 \pm 0.27$  | $1.64 \pm 0.47$  |
| PFHpA                                        | 375-85-9    | 6            | 7                 | 13        | 0.95  | $15.3 \pm 0.41$              | $0.68 \pm 0.15$  | $0.44 \pm 0.20$  |
| PFOA                                         | 335-67-1    | 7            | 8                 | 15        | 0.97  | $13.5 \pm 0.41$              | $0.84 \pm 0.15$  | $0.83 \pm 0.38$  |
| PFNA                                         | 375-95-1    | 8            | 9                 | 17        | 0.97  | $13.4 \pm 0.34$              | $0.60 \pm 0.23$  | $0.58 \pm 0.21$  |
| PFDA                                         | 335-76-2    | 9            | 10                | 19        | 0.99  | $17.2 \pm 0.13$              | $1.11 \pm 0.17$  | $1.19 \pm 0.59$  |
| PFUnDA                                       | 2058-94-8   | 10           | 11                | 21        | 0.98  | $9.02 \pm 0.47$              | $1.49 \pm 0.048$ | $1.36 \pm 1.06$  |
| PFDoA                                        | 307-55-1    | 11           | 12                | 23        | 0.98  | $7.74 \pm 0.20$              | $2.51 \pm 0.34$  | $1.89 \pm 0.64$  |
| <b>PFSA</b>                                  |             |              |                   |           |       |                              |                  |                  |
| PFBS                                         | 375-73-5    | 4            | 4                 | 9         | 0.96  | $11.9 \pm 0.11$              | $1.72 \pm 0.56$  | $1.65 \pm 0.69$  |
| PFHxS                                        | 3871-99-6   | 6            | 6                 | 13        | 0.98  | $11.0 \pm 0.24$              | $0.98 \pm 0.069$ | $0.71 \pm 0.47$  |
| PFOS                                         | 2795-39-3   | 8            | 8                 | 17        | 0.98  | $16.2 \pm 0.90$              | $1.13 \pm 0.32$  | $0.69 \pm 0.078$ |
| <b>Per- and Polyfluorinated Alkyl Ethers</b> |             |              |                   |           |       |                              |                  |                  |
| E1                                           | 3330-15-2   | 5            | 5                 | 11        | 0.93  | $7.32 \pm 0.059$             | $2.34 \pm 0.56$  | $1.64 \pm 0.34$  |
| HFPO-DA                                      | 13252-13-6  | 5            | 5                 | 11        | 0.97  | $13.7 \pm 0.17$              | $1.83 \pm 0.87$  | $1.60 \pm 0.55$  |
| Nafion bp2                                   | 749836-20-2 | 7            | 7                 | 14        | 0.98  | $12.4 \pm 0.17$              | $1.90 \pm 0.59$  | $1.51 \pm 0.37$  |
| PFO3DoDA                                     | 151772-59-7 | 6            | 7                 | 13        | 0.95  | $20.6 \pm 0.82$              | $1.67 \pm 0.47$  | $1.53 \pm 0.34$  |
| <b>Fluorotelomer Alcohols</b>                |             |              |                   |           |       |                              |                  |                  |
| 4:2 FTOH                                     | 2043-47-2   | 4            | 6                 | 9         | N/A   | $0 \pm 0$                    | N/A              | N/A              |
| 6:2 FTOH                                     | 647-42-7    | 6            | 8                 | 13        | N/A   | $0 \pm 0$                    | N/A              | N/A              |
| <b>Fluorotelomer Carboxylic Acids</b>        |             |              |                   |           |       |                              |                  |                  |
| 3:3 FTCA                                     | 356-02-5    | 3            | 6                 | 7         | 0.81  | $2.24 \pm 0.062$             | $2.06 \pm 0.51$  | $1.71 \pm 0.47$  |
| 5:3 FTCA                                     | 914637-49-3 | 5            | 8                 | 11        | 0.94  | $3.62 \pm 0.14$              | $1.48 \pm 0.24$  | $0.62 \pm 0.10$  |
| 6:3 FTCA                                     | 27854-30-4  | 6            | 9                 | 13        | 0.95  | $9.50 \pm 0.20$              | $0.84 \pm 0.21$  | $0.81 \pm 0.23$  |
| 8:3 FTCA                                     | 83310-58-1  | 8            | 11                | 17        | 0.89  | $10.01 \pm 0.17$             | $1.16 \pm 0.42$  | $0.97 \pm 0.17$  |
| <b>Fluorotelomer Sulfonic Acids</b>          |             |              |                   |           |       |                              |                  |                  |
| 4:2 FTSA                                     | 757124-72-4 | 4            | 6                 | 9         | 0.93  | $3.49 \pm 0.12$              | $1.45 \pm 0.34$  | $1.07 \pm 0.47$  |
| 6:2 FTSA                                     | 59587-38-1  | 6            | 8                 | 13        | 0.91  | $3.60 \pm 0.47$              | $0.47 \pm 0.29$  | $0.37 \pm 0.34$  |

Chain length is the number of per/poly fluorinated carbons;  $\Delta T_m$  is  $^{\circ}$ C, EC50 and Kd are mean values reported in  $\pm$  SD. Each compound was run on at least two separate plates with  $n \geq 4$

6:2FTA  
PFOA PFBS  
PFOS  
PFBA

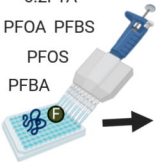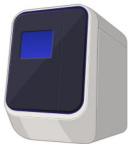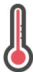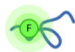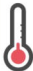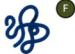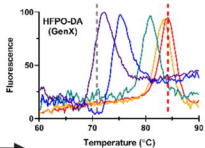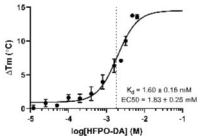

**PFCA**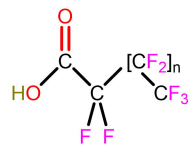

n = 1 - 9

**PFEA**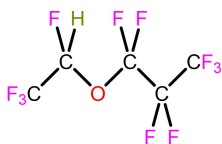E1  
3330-15-2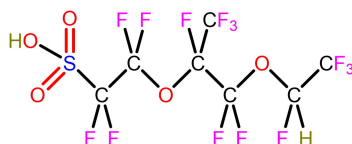Nafion byproduct 2  
749836-20-2**PFSA**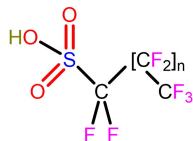

n = 2, 4, 6

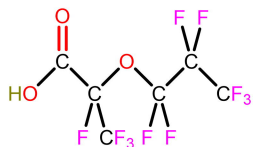HFPO-DA  
13252-13-6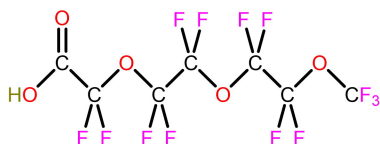PFO3DoDA  
151772-59-7**FTCA**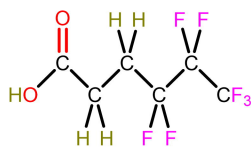3:3 FTCA  
356-02-5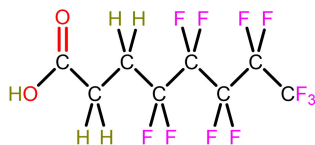5:3 FTCA  
914637-49-3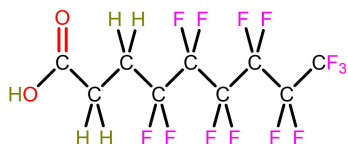6:3 FTCA  
27854-30-4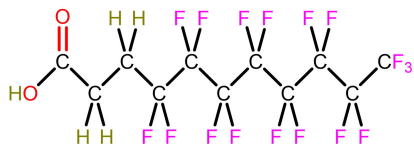8:3 FTCA  
83310-58-1**FTSA**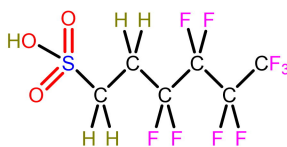4:2 FTSA  
757124-72-4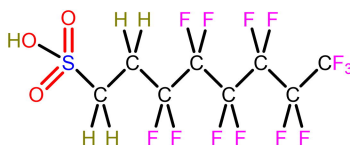6:2 FTSA  
59587-38-1**FTOH**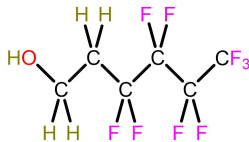4:2 FTOH  
2043-47-2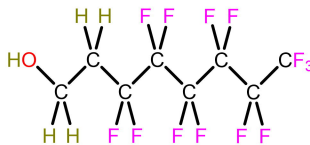6:2 FTOH  
647-42-7

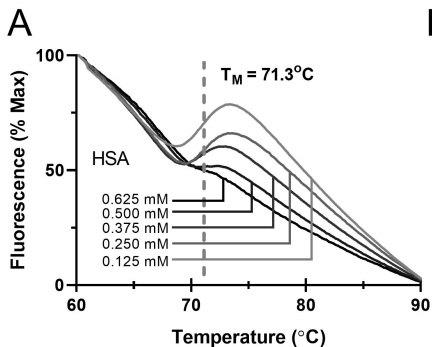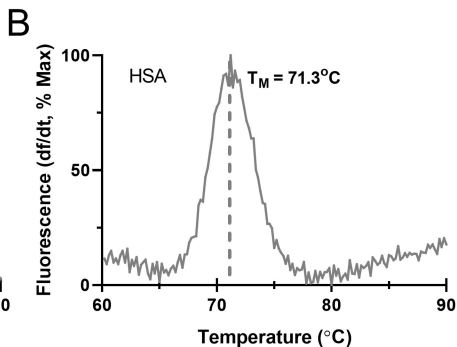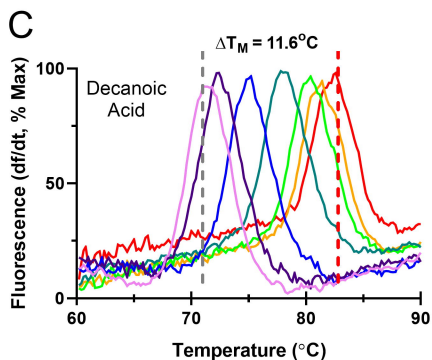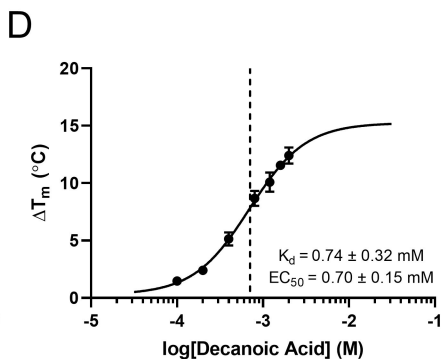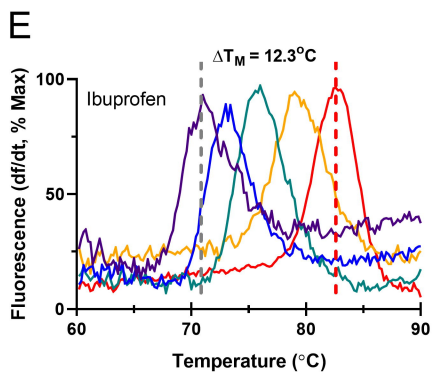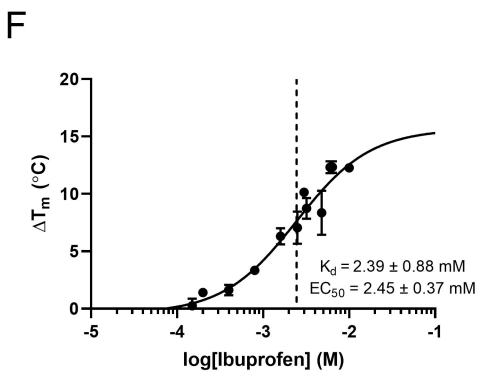

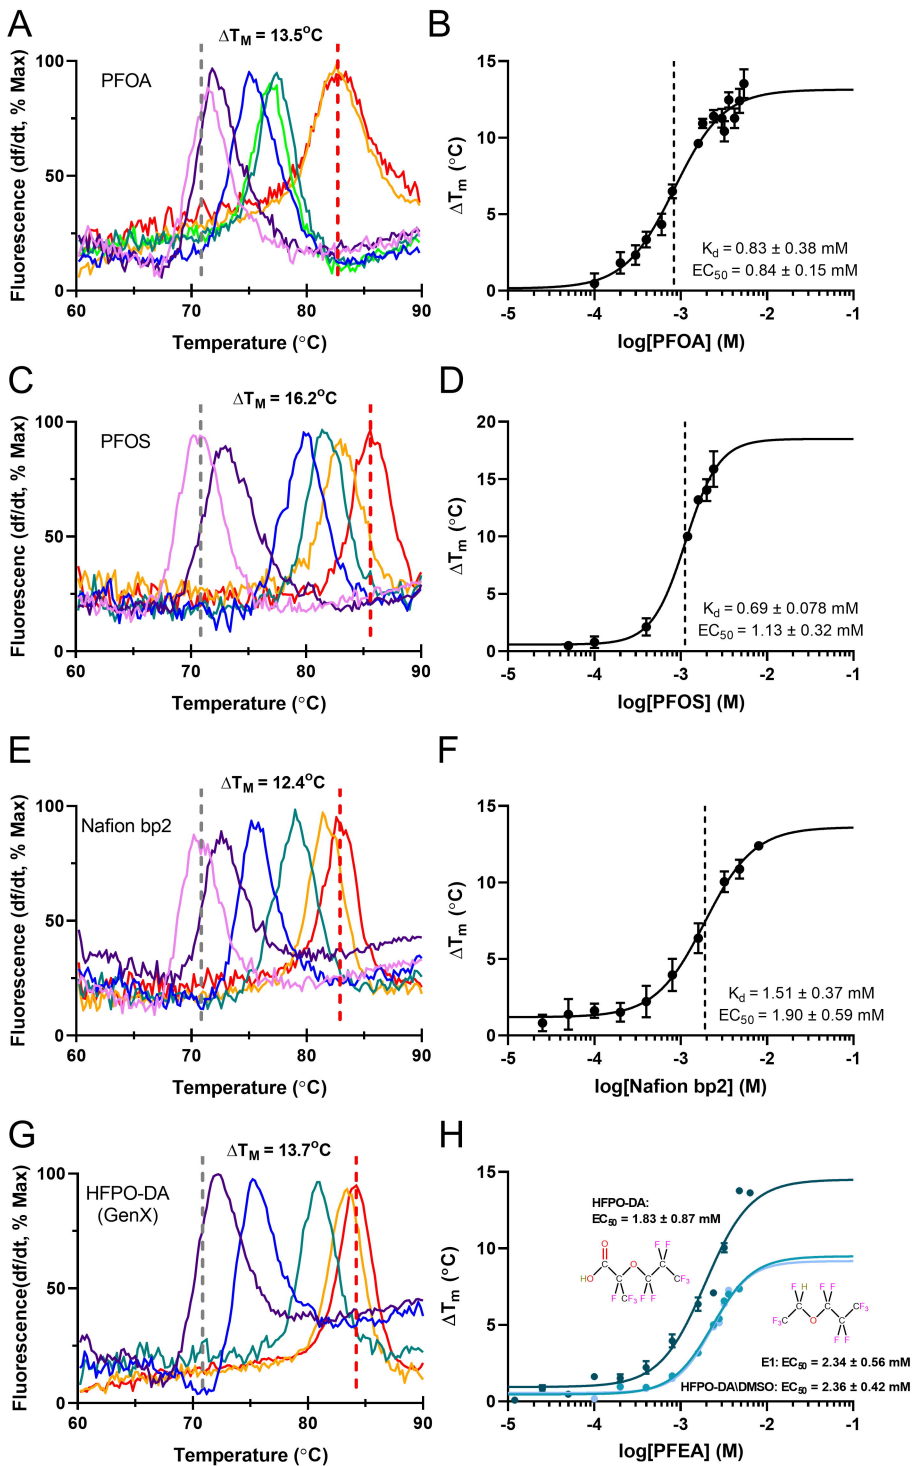

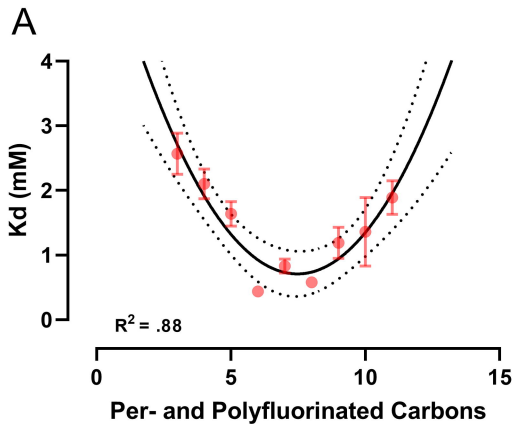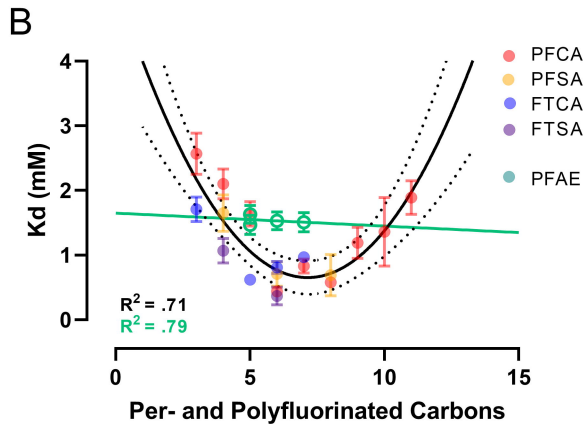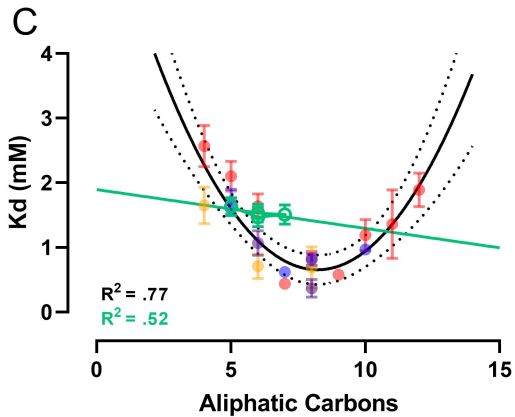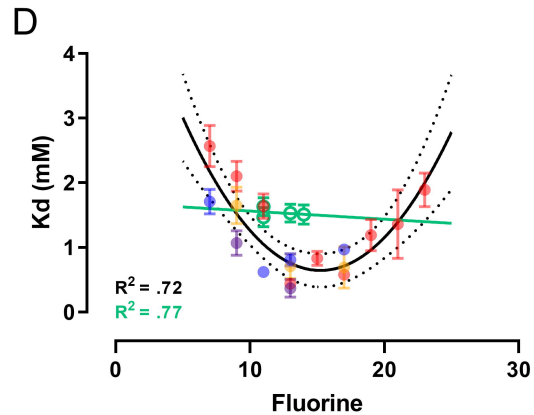

Source: https://www.biorxiv.org/content/10.1101/2021.06.13.448257v1.full.pdf
